# Supplementary material for: Cyano modified triphenylmethyl radical skeletons: higher stability and efficiency
Source: Royal Society of Chemistry journal article supplement (doi:10.1039/d4cc00903g), 2024-01-01
Supplement: d4cc00903g1.pdf [file d4cc00903g1.pdf]

# Cyano Modified Triphenylmethyl Radical Skeletons: Higher Stability and Efficiency

Kuo Lv<sup>†</sup>, Minzhe Zhang<sup>†</sup>, Xin Xia, WenJing Liu, Keke Wan, Ming Zhang and Feng Li\*

State Key Laboratory of Supramolecular Structure and Materials, College of Chemistry, Jilin University Changchun, 130012, P. R. China

\*E-mail: [lifeng01@jlu.edu.cn](mailto:lifeng01@jlu.edu.cn)

## Contents

1. Synthesis Section
2. Photophysical parameters of BnBTM and bisBnTM in various solvents
3. Theoretical calculation results
4. Electrochemical properties and TGA curve
5. Extracted results of TD-DFT calculations
6. References

## **General information**

All reagents and solvents required for synthesis and characterization are purchased from commercial suppliers and used directly without any treatment. The nuclear magnetic resonance ( $^1\text{H}$  NMR) spectra were recorded on the Bruker AVANCEIII 500 spectrometer at 500 MHz at 298 K and tetramethyl silane (TMS) ( $\delta\text{H} = 0$  ppm) as the internal standard. MALDI-TOF mass spectra were recorded on a Bruker Autoflex speed TOF/TOF mass spectrometer with DCTB as a matrix. UV-vis absorption spectra were recorded on the model UV-vis-2550 spectrophotometer. Fluorescence spectra were carried out using the model RF-6000 Spectro-fluorophotometer. The electrochemical oxidation and reduction potentials were recorded using an electrochemical analyzer (CHI660C, CH Instruments, USA). The femtosecond transient absorption spectrometer Helios Fire (Ultrafast Systems LLC, USA) was used to test the ultrafast absorption spectrum with a delay resolution of 14 fs. The fluorescence decay spectra and PLQY were recorded on an Edinburgh fluorescence spectrometer (FLS980), and the lifetime of the excited states was measured by the time-correlated single photon counting method under the excitation of a laser (378 nm). Elemental analysis (C, H and N) was performed on a Elementar Vario micro cube elemental analyzer. Thermal gravimetric analysis (TGA) was characterized by a TAINSTRUMENTS Q500 TGA analyzer. DFT and TD-DFT calculations were performed on Gaussian09 series of programs using the UB3LYP function and 6-31G(d,p) basis.<sup>1</sup>

## **1. Synthesis Section**

HTTM was prepared as reported.<sup>2</sup>

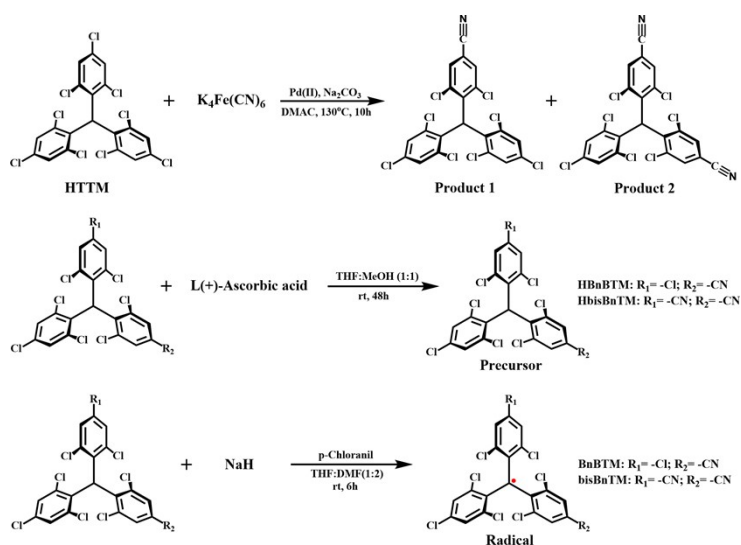

**Scheme S1.** The synthesis route of BnBTM and bisBnTM.

**(1) Synthesis of Product 1 and Product 2.**<sup>3</sup>

Dichlorobis[di-*tert*-butyl(*p*-dimethylaminophenyl)phosphino]palladium(II) (0.14 g, 0.2 mmol), HTTM (1.11 g, 2.0 mmol), potassium hexacyanoferrate(II) (1.69 g, 4.6 mmol), and sodium carbonate (0.49 g, 4.6 mmol) were dissolved in dry *N,N*-dimethylacetamide (20.0 mL) under a nitrogen atmosphere. The reaction mixture was stirred at 130 °C for 10 h. After cooling to room temperature, the solution was extracted with dichloromethane. Organic layer washed five times with water and dried. The solvent was removed under vacuum and the crude product was purified by silica gel column chromatography (using petroleum ether: dichloromethane = 5:1 v/v). Products 1 (0.27 g, 25% yield) and 2 (0.27 g, 25% yield) were obtained as pink and red solids, respectively.

**(2) Preparation of HBnBTM and HbisBnTM**

Products 1 (0.54g, 1.0mmol) was dissolved in a mixture of tetrahydrofuran (30.0 ml)

and methanol (30.0 ml) solutions. Then, L (+)-Ascorbic acid (3.52g, 20.0mmol) was added at ambient conditions. After stirring at room temperature for 48 h, the solution was extracted with dichloromethane. The obtained organic layer was collected and dried and the solvent was removed under vacuum. Crude product was purified by silica gel column chromatography (using petroleum ether: dichloromethane = 8:1 v/v). HBnBTM was obtained as a white solid (0.49 g, 90% yield). <sup>1</sup>H NMR (500 MHz, CD<sub>2</sub>Cl<sub>2</sub>) δ 7.65 (d, J = 1.7 Hz, 1H), 7.53 (d, J = 1.7 Hz, 1H), 7.41 (dd, J = 6.4, 2.2 Hz, 2H), 7.28 (dd, J = 8.4, 2.2 Hz, 2H), 6.75 (s, 1H). MALDI-TOF-MS (m/z): calculated for C<sub>20</sub>H<sub>7</sub>Cl<sub>8</sub>N, 544.8028; found, 543.6005. Elem. Anal. Calcd for C<sub>20</sub>H<sub>7</sub>Cl<sub>8</sub>N: C 44.09, H 1.29, N 2.57; found, C 43.69, H 1.43, N 2.58.

HbisBnTM was obtained by the same method.

Products 2 (0.53g, 1.0mmol) was dissolved in a mixture of tetrahydrofuran (30.0 ml) and methanol (30.0 ml) solutions. Then, L (+)-Ascorbic acid (3.52g, 20.0mmol) was added at ambient conditions. After stirring at room temperature for 48 h, the solution was extracted with dichloromethane. The obtained organic layer was collected and dried and the solvent was removed under vacuum. Crude product was purified by silica gel column chromatography (using petroleum ether: dichloromethane = 4:1 v/v).

HbisBnTM was obtained as a white solid (0.49 g, 92% yield). <sup>1</sup>H NMR (500 MHz, CD<sub>2</sub>Cl<sub>2</sub>) δ 7.67 (dd, J = 6.1, 1.7 Hz, 2H), 7.54 (dd, J = 8.0, 1.7 Hz, 2H), 7.43 (d, J = 2.2 Hz, 1H), 7.30 (d, J = 2.2 Hz, 1H), 6.81 (s, 1H). MALDI-TOF-MS (m/z): calculated for C<sub>21</sub>H<sub>7</sub>Cl<sub>7</sub>N<sub>2</sub>, 533.8399; found, 533.3288. Elem. Anal. Calcd for C<sub>21</sub>H<sub>7</sub>Cl<sub>7</sub>N<sub>2</sub>: C 47.11, H 1.32, N 5.23; found, C 47.85, H 1.67, N 5.23.



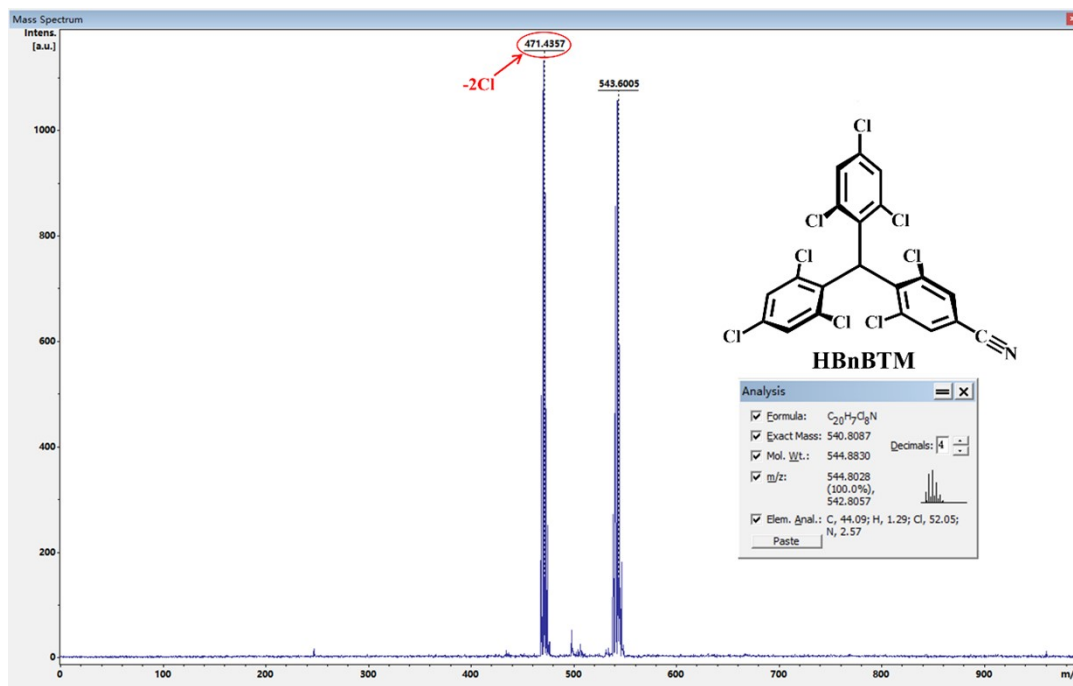

**Fig. S3** MALDI-TOF-MS spectrum of HBnBTM.

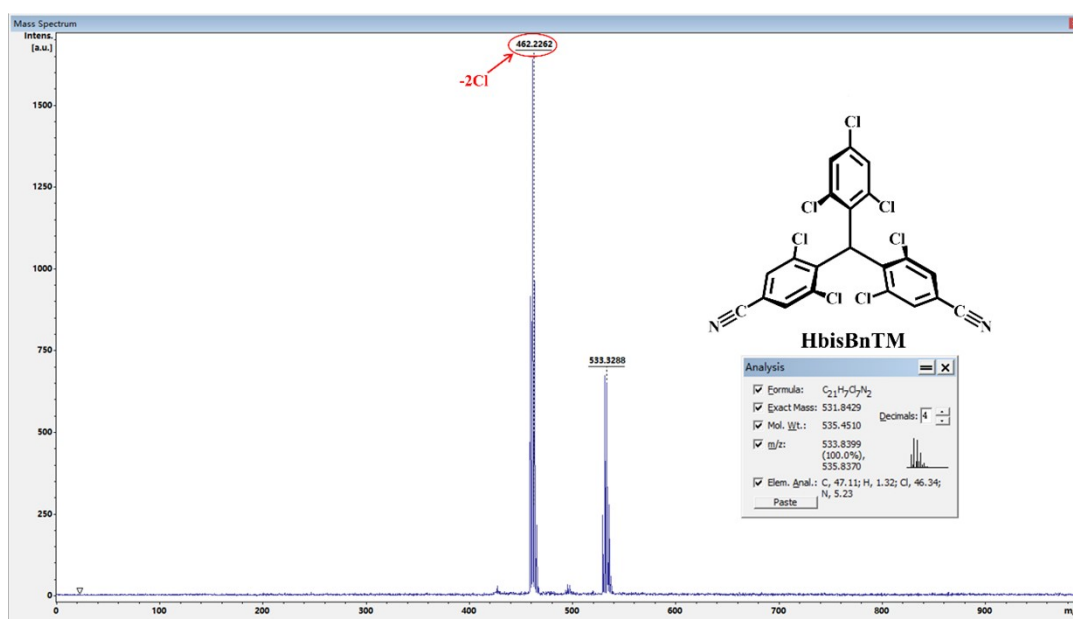

**Fig. S4** MALDI-TOF-MS spectrum of HbisBnTM.

### (3) Preparation of BnBTM and bisBnTM

Under argon atmosphere and in the dark, HBnBTM (0.54 g, 1.0 mmol) was dissolved in a mixture of dry THF (5.0 ml) and DMF (10.0 ml). Then NaH (0.40g, 60%, 10.00 mmol) was added. The solution was stirred for 5 h in the dark at room temperature, and then p-chloranil (1.23 g, 5.0 mmol) was added. The solution was stirred for further 1 h. After the reaction finished, the solvent was removed under vacuum and the crude product was purified by silica gel column chromatography (using petroleum ether: dichloromethane = 9:1 v/v). The crude product was recrystallized from dichloromethane and methanol. Finally, BnBTM was obtained as a red solid (0.39 g, 72% yield). MALDI-TOF-MS (m/z): calculated for C<sub>20</sub>H<sub>6</sub>Cl<sub>8</sub>N, 543.7949; found, 542.5274. Elem. Anal. Calcd for C<sub>20</sub>H<sub>6</sub>Cl<sub>8</sub>N: C 44.17, H 1.11, N 2.58; found, C 44.44, H 1.39, N 2.62.

bisBnTM was obtained by the same method.

Under argon atmosphere and in the dark, HbisBnTM (0.53 g, 1.0 mmol) was dissolved in a mixture of dry THF (5.0 ml) and DMF (10.0 ml). Then NaH (0.40g, 60%, 10.00 mmol) was added. The solution was stirred for 5 h in the dark at room temperature, and then p-chloranil (1.23 g, 5.0 mmol) was added. The solution was stirred for further 1 h. After the reaction finished, the solvent was removed under vacuum and the crude product was purified by silica gel column chromatography (using petroleum ether: dichloromethane = 4:1 v/v). The crude product was recrystallized from dichloromethane and methanol. bisBnTM was obtained as a red solid (0.39 g, 73% yield). MALDI-TOF-MS (m/z): calculated for C<sub>21</sub>H<sub>6</sub>Cl<sub>7</sub>N<sub>2</sub>, 532.8321; found, 532.4715.

Elem. Anal. Calcd for  $C_{21}H_6Cl_7N_2$ : C 47.20, H 1.13, N 5.24; found, C 47.69, H 1.36, N

5.37.

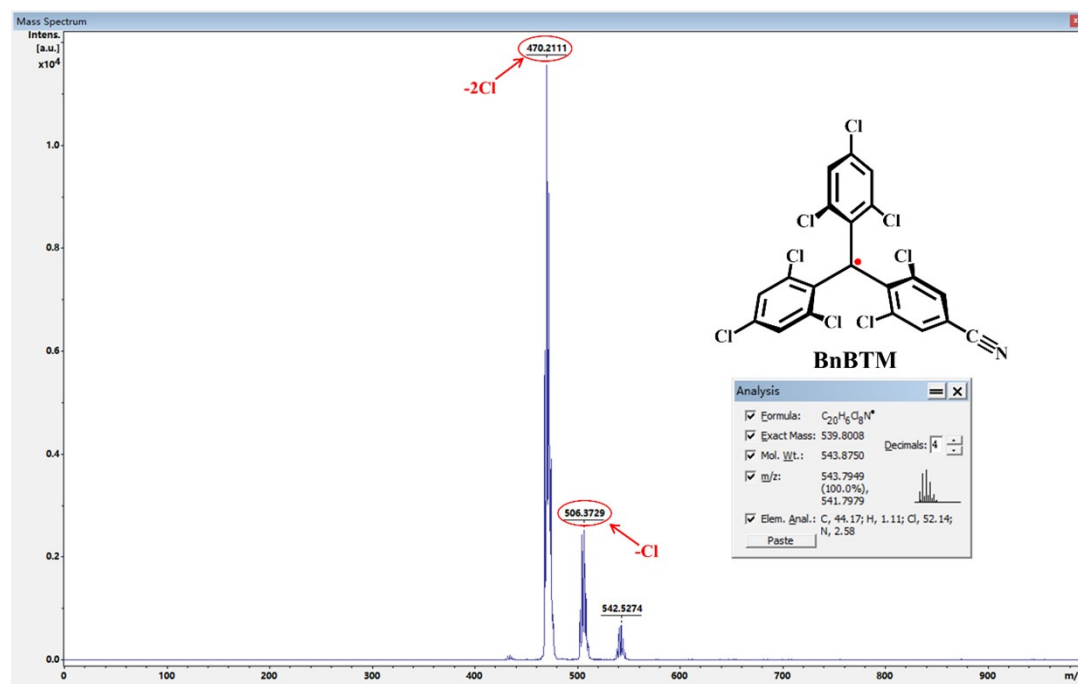

Fig. S4 MALDI-TOF-MS spectrum of BnBTM.

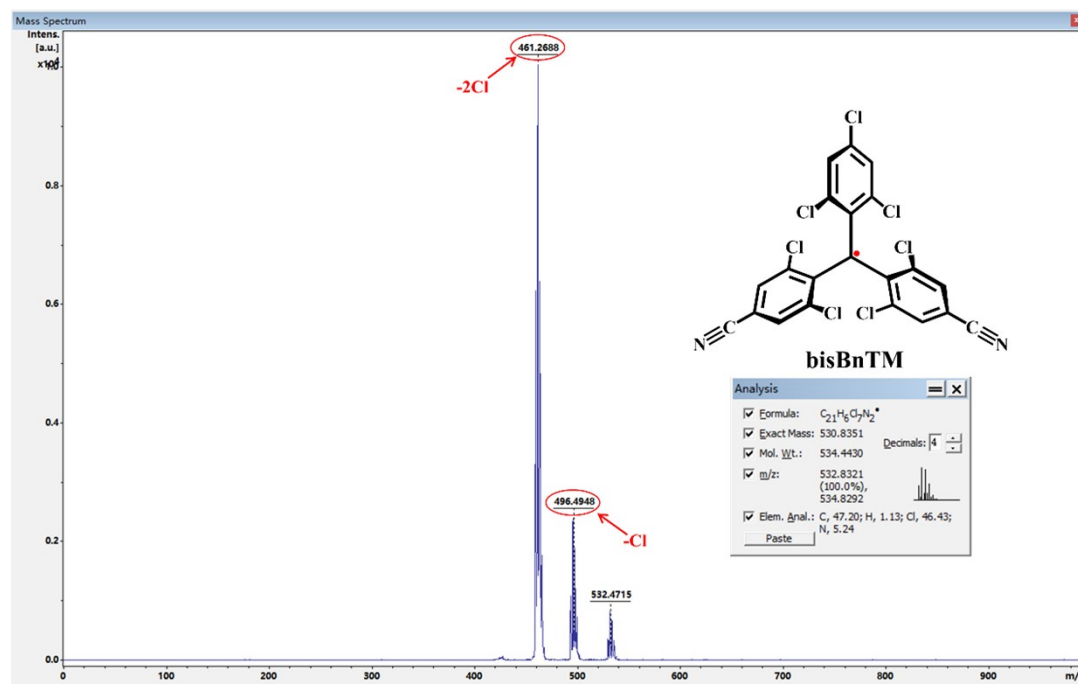

Fig. S6 MALDI-TOF-MS spectrum of bisBnTM.



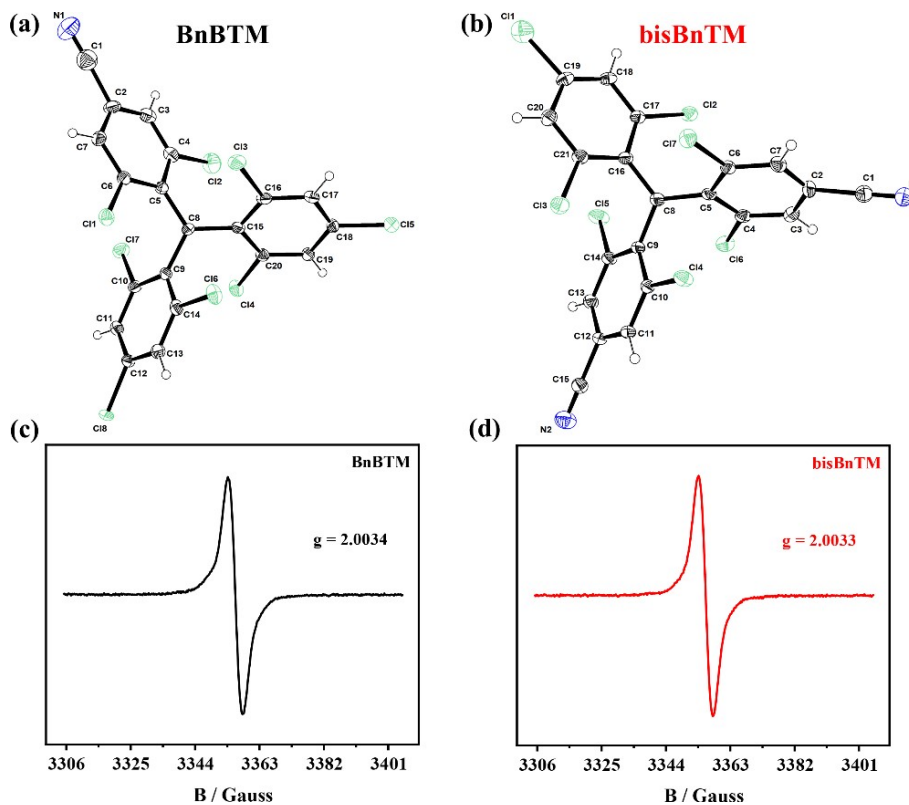

**Fig. S7** Crystal structure of (a) BnBTM and (b) bisBnTM with thermal ellipsoids set at 50 % probability; EPR spectrum of (c) BnBTM and (d) bisBnTM in chloroform at room temperature.

**Table S1.** Crystal data and structure refinement for BnBTM.

| Identification code                | BnBTM                                            |
|------------------------------------|--------------------------------------------------|
| Empirical formula                  | C <sub>20</sub> H <sub>6</sub> Cl <sub>8</sub> N |
| Formula weight                     | 543.86                                           |
| Temperature/K                      | 110.00                                           |
| Crystal system                     | monoclinic                                       |
| Space group                        | P2 <sub>1</sub> /c                               |
| a/Å                                | 14.0305(9)                                       |
| b/Å                                | 8.0731(5)                                        |
| c/Å                                | 18.9296(12)                                      |
| α/°                                | 90                                               |
| β/°                                | 94.608(2)                                        |
| γ/°                                | 90                                               |
| Volume/Å <sup>3</sup>              | 2137.2(2)                                        |
| Z                                  | 4                                                |
| ρ <sub>calc</sub> /cm <sup>3</sup> | 1.690                                            |
| μ/mm <sup>-1</sup>                 | 1.063                                            |

|                                                  |                                                                        |
|--------------------------------------------------|------------------------------------------------------------------------|
| F(000)                                           | 1076.0                                                                 |
| Crystal size/mm <sup>3</sup>                     | 0.05 × 0.03 × 0.02                                                     |
| Radiation                                        | MoK $\alpha$ ( $\lambda$ = 0.71073)                                    |
| 2 $\Theta$ range for data collection/ $^{\circ}$ | 5.4 to 55.004                                                          |
| Index ranges                                     | -18 $\leq$ h $\leq$ 18, -10 $\leq$ k $\leq$ 10, -24 $\leq$ l $\leq$ 24 |
| Reflections collected                            | 47418                                                                  |
| Independent reflections                          | 4910 [ $R_{\text{int}}$ = 0.0422, $R_{\text{sigma}}$ = 0.0213]         |
| Data/restraints/parameters                       | 4910/80/283                                                            |
| Goodness-of-fit on F <sup>2</sup>                | 1.148                                                                  |
| Final R indexes [ $I \geq 2\sigma(I)$ ]          | $R_1$ = 0.0585, $wR_2$ = 0.1391                                        |
| Final R indexes [all data]                       | $R_1$ = 0.0686, $wR_2$ = 0.1459                                        |
| Largest diff. peak/hole / e $\text{\AA}^{-3}$    | 0.65/-0.80                                                             |

**Table S2.** Crystal data and structure refinement for bisBnTM.

| Identification code                              | bisBnTM                                                                |
|--------------------------------------------------|------------------------------------------------------------------------|
| Empirical formula                                | C <sub>21</sub> H <sub>6</sub> Cl <sub>7</sub> N <sub>2</sub>          |
| Formula weight                                   | 534.43                                                                 |
| Temperature/K                                    | 201.00                                                                 |
| Crystal system                                   | triclinic                                                              |
| Space group                                      | P-1                                                                    |
| a/ $\text{\AA}$                                  | 8.2197(11)                                                             |
| b/ $\text{\AA}$                                  | 11.2036(15)                                                            |
| c/ $\text{\AA}$                                  | 13.6336(18)                                                            |
| $\alpha/^\circ$                                  | 67.189(5)                                                              |
| $\beta/^\circ$                                   | 84.761(5)                                                              |
| $\gamma/^\circ$                                  | 73.004(5)                                                              |
| Volume/ $\text{\AA}^3$                           | 1106.4(3)                                                              |
| Z                                                | 2                                                                      |
| $\rho_{\text{calc}}/\text{cm}^3$                 | 1.604                                                                  |
| $\mu/\text{mm}^{-1}$                             | 0.909                                                                  |
| F(000)                                           | 530.0                                                                  |
| Crystal size/mm <sup>3</sup>                     | 0.05 × 0.03 × 0.02                                                     |
| Radiation                                        | MoK $\alpha$ ( $\lambda$ = 0.71073)                                    |
| 2 $\Theta$ range for data collection/ $^{\circ}$ | 5.184 to 55.058                                                        |
| Index ranges                                     | -10 $\leq$ h $\leq$ 10, -14 $\leq$ k $\leq$ 14, -17 $\leq$ l $\leq$ 17 |
| Reflections collected                            | 27967                                                                  |
| Independent reflections                          | 5069 [ $R_{\text{int}}$ = 0.0539, $R_{\text{sigma}}$ = 0.0363]         |
| Data/restraints/parameters                       | 5069/56/298                                                            |
| Goodness-of-fit on F <sup>2</sup>                | 1.035                                                                  |

|                                                |                                  |
|------------------------------------------------|----------------------------------|
| Final R indexes [ $I \geq 2\sigma(I)$ ]        | $R_1 = 0.0443$ , $wR_2 = 0.1015$ |
| Final R indexes [all data]                     | $R_1 = 0.0515$ , $wR_2 = 0.1067$ |
| Largest diff. peak/hole / $e \text{ \AA}^{-3}$ | 0.88/-1.28                       |

## 2. Photophysical parameters of BnBTM and bisBnTM in various solvents

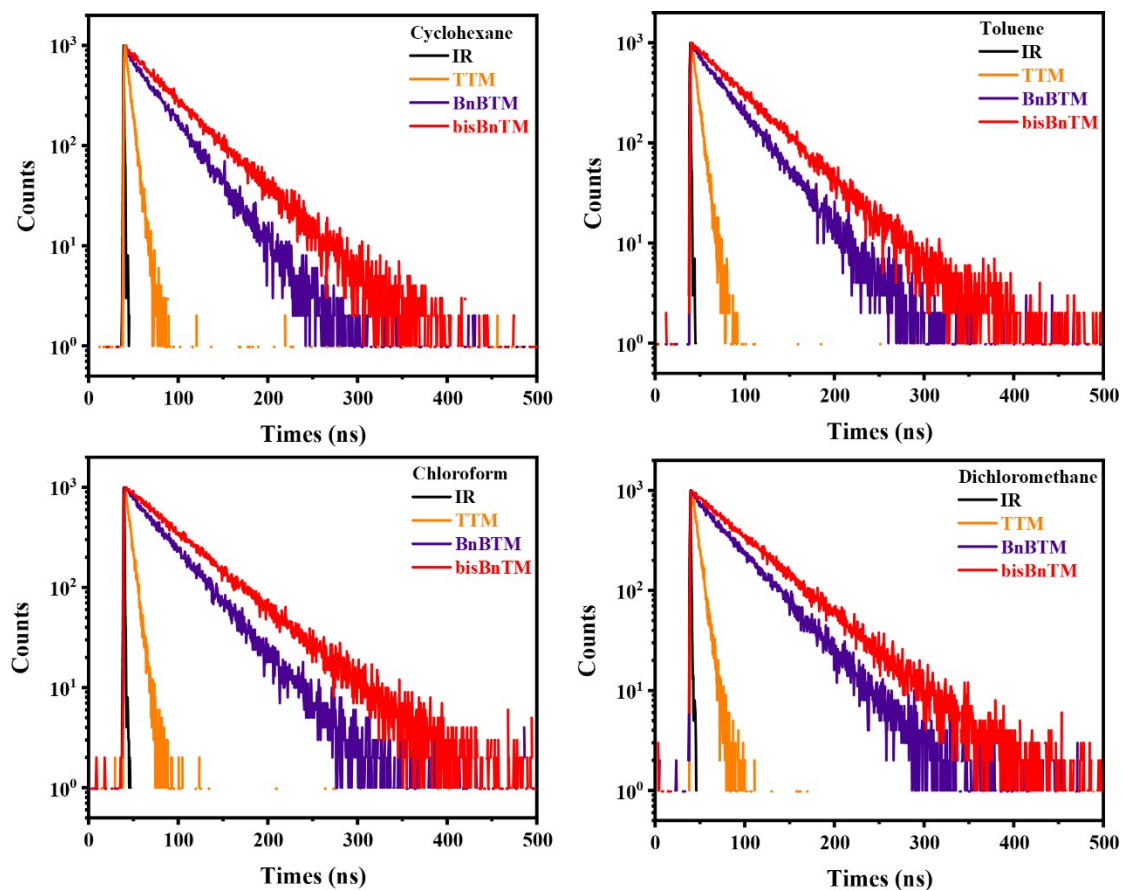

**Fig. S8** Transient photoluminescence decay spectra of TTM, BnBTM and bisBnTM in various solvents at room temperature.

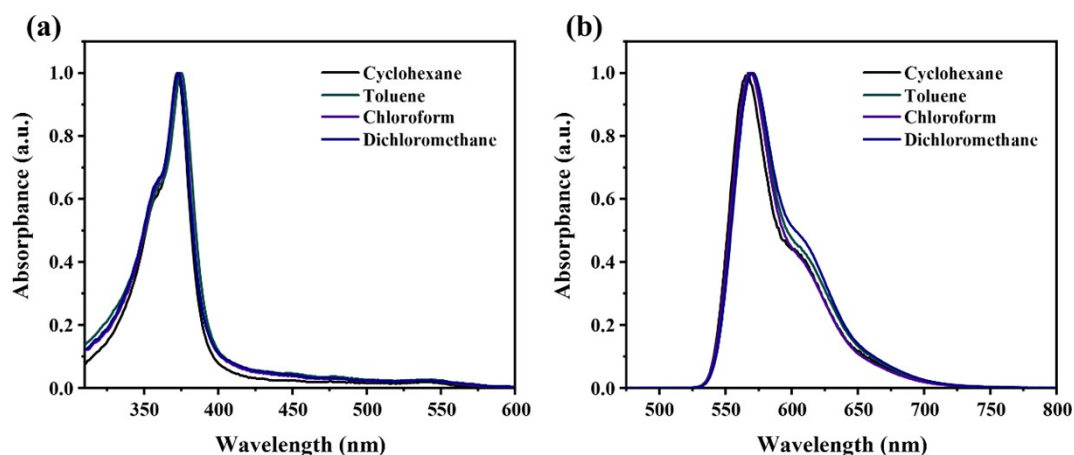

**Fig. S9** The normalized UV-vis absorption and PL spectra of TTM in various solvents ( $10^{-5}$  M) at room temperature.

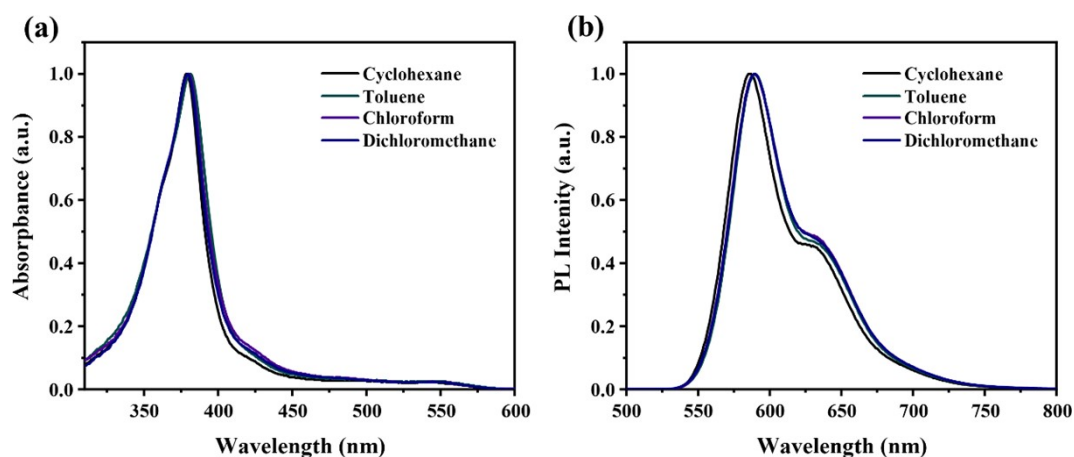

**Fig. S10** The normalized UV-vis absorption and PL spectra of BnBTM in various solvents ( $10^{-5}$  M) at room temperature.

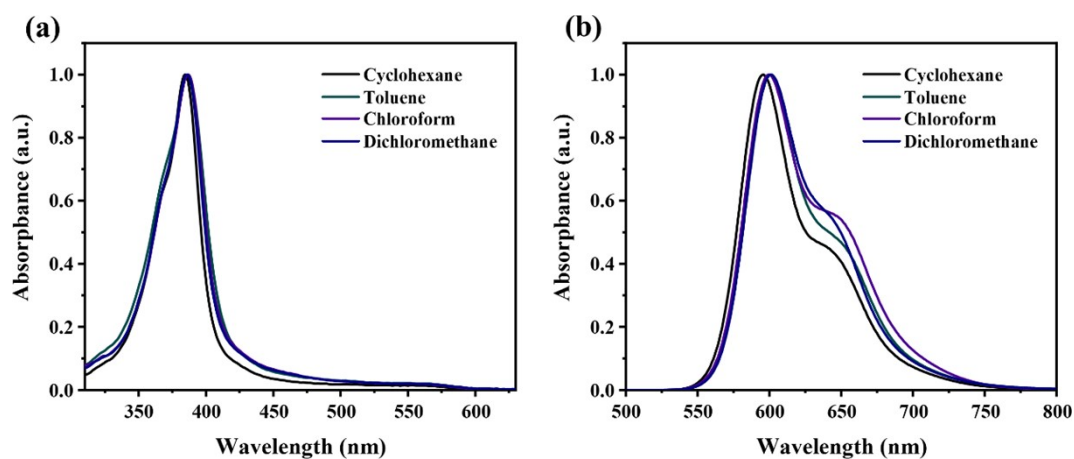

**Fig. S11** The normalized UV-vis absorption and PL spectra of bisBnTM in various solvents ( $10^{-5}$  M) at room temperature.

**Table S3.** Photophysical parameters of TTM, BnBTM, and bisBnTM in different solvents.

| Radical | Solvent         | $\lambda_{\text{abs}}^{[a]}$<br>(nm) | $\lambda_{\text{PL}}^{[b]}$<br>(nm) | PLQE <sup>[c][d]</sup><br>(%) | $\tau$ <sup>[d]</sup><br>(ns) | $k_r$ <sup>[e]</sup><br>$10^6$ (s <sup>-1</sup> ) | $k_{nr}$ <sup>[e]</sup><br>$10^6$ (s <sup>-1</sup> ) |
|---------|-----------------|--------------------------------------|-------------------------------------|-------------------------------|-------------------------------|---------------------------------------------------|------------------------------------------------------|
| TTM     | Toluene         | 375/543                              | 570                                 | 1.4                           | 5.9                           | 2.4                                               | 166.0                                                |
|         | Chloroform      | 373/543                              | 568                                 | 1.7                           | 6.0                           | 2.8                                               | 164.7                                                |
|         | Dichloromethane | 373/542                              | 570                                 | 1.5                           | 6.4                           | 2.4                                               | 154.4                                                |
| BnBTM   | Toluene         | 381/551                              | 590                                 | 5.3                           | 37.8                          | 1.4                                               | 25.1                                                 |
|         | Chloroform      | 380/552                              | 592                                 | 6.5                           | 41.2                          | 1.6                                               | 22.7                                                 |
|         | Dichloromethane | 379/551                              | 587                                 | 6.2                           | 42.9                          | 1.4                                               | 21.9                                                 |
| bisBnTM | Toluene         | 387/563                              | 600                                 | 10.4                          | 50.9                          | 2.0                                               | 17.6                                                 |
|         | Chloroform      | 387/560                              | 600                                 | 11.2                          | 56.5                          | 2.0                                               | 15.7                                                 |
|         | Dichloromethane | 386/562                              | 601                                 | 10.0                          | 55.7                          | 1.8                                               | 16.1                                                 |

<sup>[a]</sup> absorption peaks in different solvents. <sup>[b]</sup> emission peaks in various solvents <sup>[c]</sup> measured with a calibrated integrating sphere system. <sup>[d]</sup> measured using Edinburgh fluorescence spectrometer (FLS980) at room temperature.

<sup>[e]</sup> Calculated from the equation:  $\phi = k_r/(k_r + k_{nr})$ ;  $\tau = 1/(k_r + k_{nr})$ .

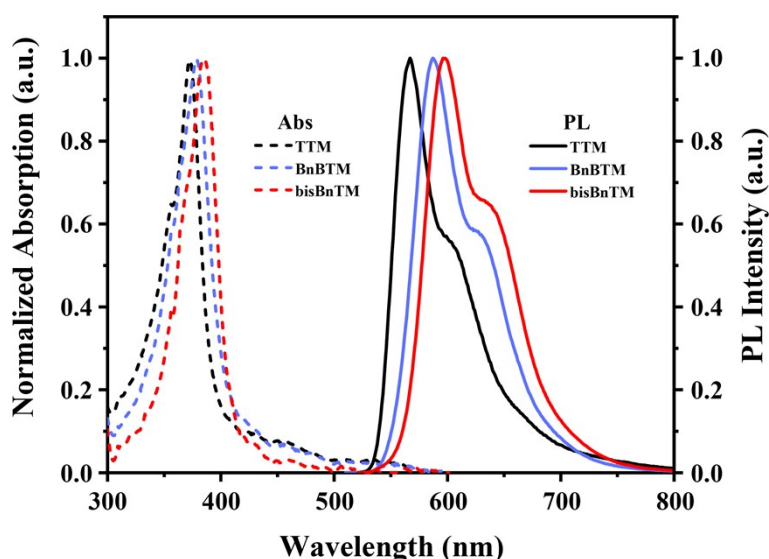

**Fig. S12** Normalized UV-vis absorption and PL spectra of TTM, BnBTM and bisBnTM in PMMA film at 3 wt%.

**Table S4.** Photophysical parameters of TTM, BnBTM and bisBnTM in PMMA film.

| Radical | Concentration<br>(wt%) | $\lambda_{\text{abs}}^{[a]}$<br>(nm) | $\lambda_{\text{PL}}^{[b]}$<br>(nm) | PLQE <sup>[c]</sup><br>(%) |
|---------|------------------------|--------------------------------------|-------------------------------------|----------------------------|
| TTM     | 3                      | 373                                  | 567                                 | 5.0                        |
| BnBTM   | 3                      | 379                                  | 587                                 | 9.0                        |
| bisBnTM | 3                      | 385                                  | 596                                 | 12.0                       |

<sup>[a]</sup> absorption peaks in PMMA film. <sup>[b]</sup> emission peaks in PMMA film. <sup>[c]</sup> The PLQE was measured with a calibrated integrating sphere system.

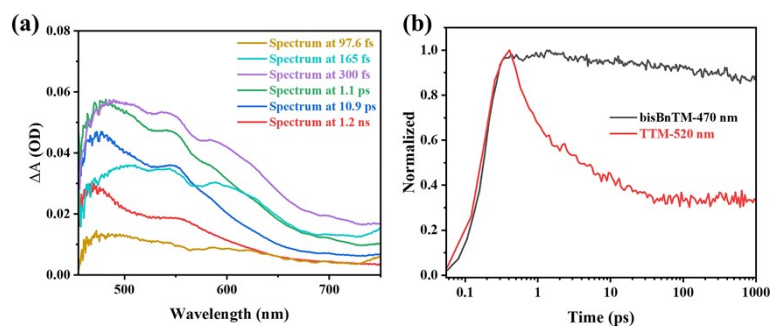

**Fig. S13** Transient absorption studies of bisBnTM and TTM. (a) Femtosecond to nanosecond time-slices from transient absorption studies of bisBnTM (375 nm excitation,  $1 \times 10^{-4}$  M in cyclohexane). (b) Kinetic profiles of bisBnTM and TTM (375 nm excitation,  $1 \times 10^{-4}$  M in chloroform). The two curves represent the  $D_1$  excited state dynamics of their respective molecules.

Fig. 13 (a) displays the transient absorption spectra of bisBnTM within the visible light range. Under the excitation of a 375 nm laser pulse, the ground state molecules are rapidly excited to the excited state within 97.6 fs, reaching their peak at around 300 fs. This process is reflected in the excited state absorption (ESA) peaks around 490 and 545 nm. Over time, the peak positions shift towards 470 nm and 558 nm. This indicates that the molecules are initially excited to high-energy localized states, followed by a rapid transition to the first excited state ( $D_1$ ). Fig. 13(b) compares the  $D_1$  excited-state dynamics of bisBnTM and TTM in chloroform solvent. The  $D_1$  excited state of TTM shows an obviously shorter excited state lifetime. This suggests that the non-radiative transition process of bisBnTM is effectively suppressed compared to that of TTM.

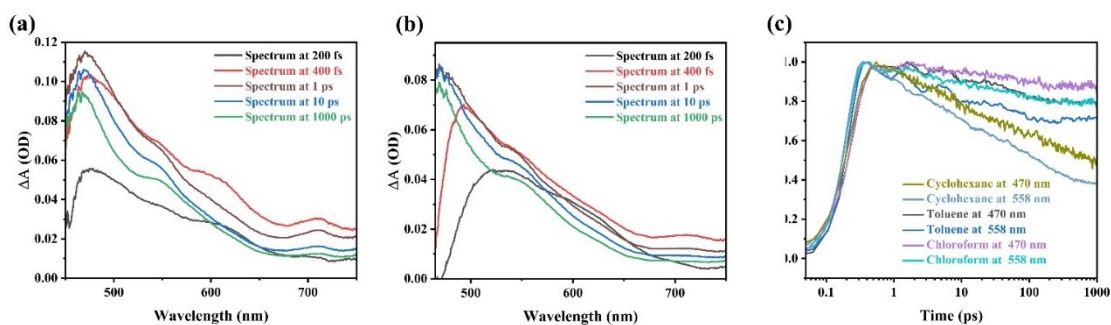

**Fig. S14** Femtosecond to nanosecond time-slices from transient absorption studies of bisBnTM in (a) toluene and (b) chloroform ( $10^{-4}$  M); (c) kinetic profiles of bisBnTM in those solvents (excited at 375 nm).

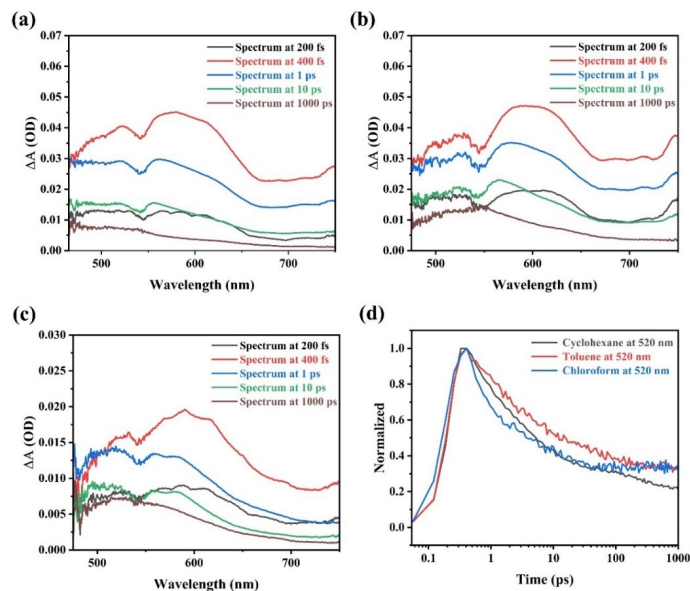

**Fig. S15.** Femtosecond to nanosecond time-slices from transient absorption studies of TTM in (a) cyclohexane, (b) toluene and (c) chloroform; (d) kinetic profiles of TTM at 520nm in those solvents (excited at 375 nm).

### 3. Theoretical calculation results.

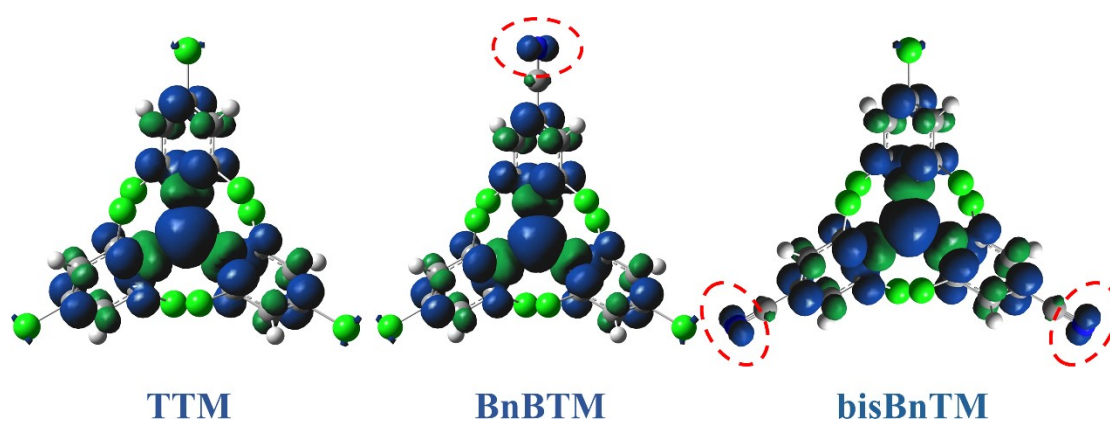

**Fig. S16** Spin density distribution of TTM, BnBTM and bisBnTM by DFT calculations (isovalue =0.0015).

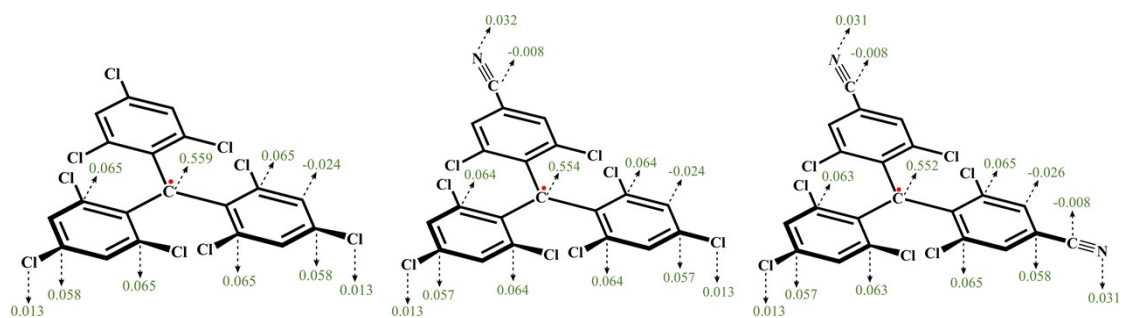

**Fig. S17** Spin densities of the optimized geometries of TTM, BnBTM, and bisBnTM (calculated by Multiwfn at Becke mode).<sup>4</sup>

**Table S5.** Spin densities of the optimized geometries of TTM, BnBTM, and bisBnTM

| TTM          |                 | BnBTM        |                 | bisBnTM      |                 |
|--------------|-----------------|--------------|-----------------|--------------|-----------------|
| Atomic space | Spin population | Atomic space | Spin population | Atomic space | Spin population |
| 1(C)         | 0.065           | 1(C)         | 0.064           | 1(C)         | 0.065           |
| 2(C)         | -0.030          | 2(C)         | -0.029          | 2(C)         | -0.033          |
| 3(C)         | 0.065           | 3(C)         | 0.064           | 3(C)         | 0.065           |
| 4(C)         | -0.024          | 4(C)         | -0.024          | 4(C)         | -0.026          |
| 5(C)         | 0.058           | 5(C)         | 0.057           | 5(C)         | 0.058           |
| 6(C)         | -0.024          | 6(C)         | -0.024          | 6(C)         | -0.026          |
| 7(H)         | 0.001           | 7(H)         | 0.001           | 7(H)         | 0.001           |
| 8(H)         | 0.001           | 8(H)         | 0.001           | 8(H)         | 0.001           |
| 9(C)         | 0.559           | 9(C)         | 0.554           | 9(C)         | 0.552           |
| 10(C)        | -0.030          | 10(C)        | -0.033          | 10(C)        | -0.033          |
| 11(C)        | 0.065           | 11(C)        | 0.066           | 11(C)        | 0.065           |
| 12(C)        | 0.065           | 12(C)        | 0.066           | 12(C)        | 0.065           |
| 13(C)        | -0.024          | 13(C)        | -0.027          | 13(C)        | -0.026          |
| 14(C)        | -0.024          | 14(C)        | -0.027          | 14(C)        | -0.026          |
| 15(C)        | 0.058           | 15(C)        | 0.060           | 15(C)        | 0.058           |
| 16(H)        | 0.001           | 16(H)        | 0.001           | 16(H)        | 0.001           |
| 17(H)        | 0.001           | 17(H)        | 0.001           | 17(H)        | 0.001           |
| 18(C)        | -0.030          | 18(C)        | -0.029          | 18(C)        | -0.029          |
| 19(C)        | 0.065           | 19(C)        | 0.064           | 19(C)        | 0.063           |
| 20(C)        | 0.065           | 20(C)        | 0.064           | 20(C)        | 0.063           |
| 21(C)        | -0.024          | 21(C)        | -0.024          | 21(C)        | -0.023          |
| 22(C)        | -0.024          | 22(C)        | -0.024          | 22(C)        | -0.023          |
| 23(C)        | 0.058           | 23(C)        | 0.057           | 23(C)        | 0.057           |
| 24(H)        | 0.001           | 24(H)        | 0.001           | 24(H)        | 0.001           |



|        |       |        |        |        |        |
|--------|-------|--------|--------|--------|--------|
| 25(H)  | 0.001 | 25(H)  | 0.001  | 25(H)  | 0.001  |
| 26(Cl) | 0.012 | 26(Cl) | 0.012  | 26(Cl) | 0.012  |
| 27(Cl) | 0.012 | 27(Cl) | 0.011  | 27(Cl) | 0.012  |
| 28(Cl) | 0.013 | 28(Cl) | 0.013  | 28(Cl) | 0.013  |
| 29(Cl) | 0.012 | 29(Cl) | 0.011  | 29(Cl) | 0.013  |
| 30(Cl) | 0.012 | 30(Cl) | 0.012  | 30(Cl) | 0.013  |
| 31(Cl) | 0.013 | 31(Cl) | 0.013  | 31(Cl) | 0.013  |
| 32(Cl) | 0.012 | 32(Cl) | 0.012  | 32(Cl) | 0.012  |
| 33(Cl) | 0.012 | 33(Cl) | 0.012  | 33(C)  | -0.008 |
| 34(Cl) | 0.013 | 34(C)  | -0.008 | 34(N)  | 0.031  |
|        |       | 35(N)  | 0.032  | 35(C)  | -0.008 |
|        |       |        |        | 36(N)  | 0.031  |

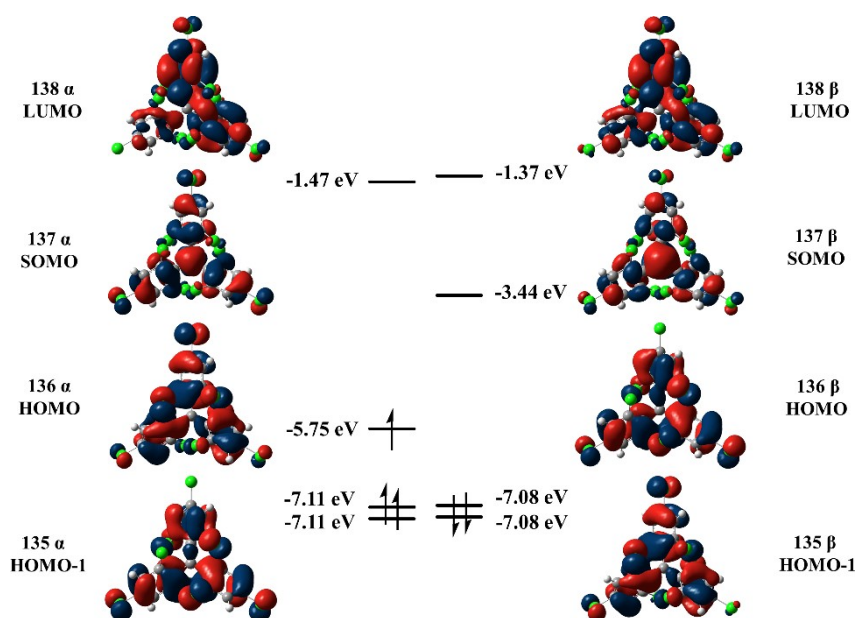

**Fig. S18** Ground-state frontier orbitals of TTM from DFT calculations (UB3LYP/6-31G(d,p)).

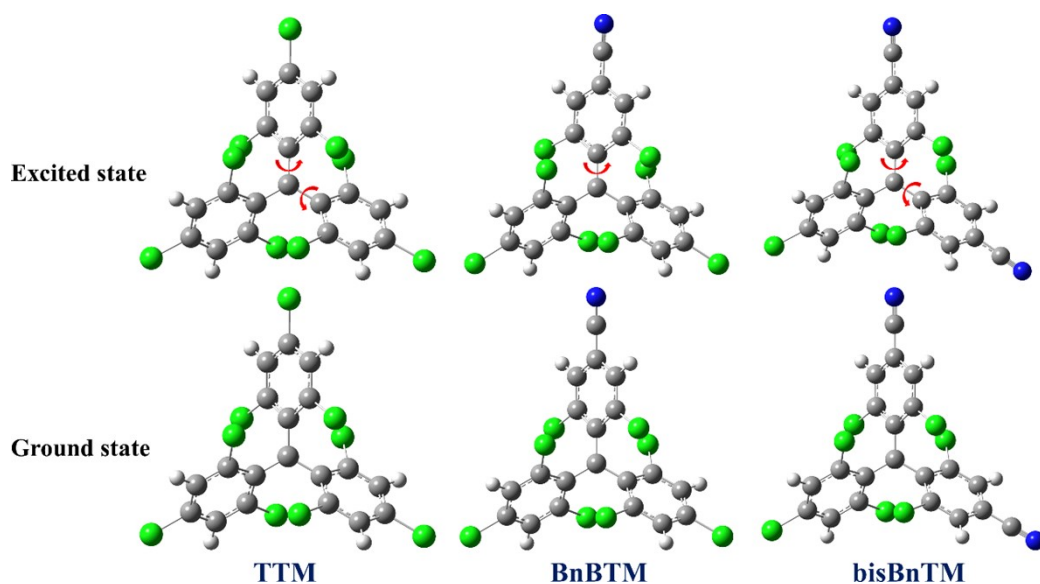

**Fig. S19** Geometries of TTM, BnBTM and bisBnTM at ground state and optimized excited state by DFT and TD-DFT calculations (UB3LYP/6-31G(d,p)).

**Table S6.** Dihedral angles of TTM, BnBTM and bisBnTM radicals in their DFT calculated  $D_0$  and  $D_1$  geometries. *A*, *B* and *C* refer to the dihedrals between the center plane of the carbon radical and the peripheral benzene ring.

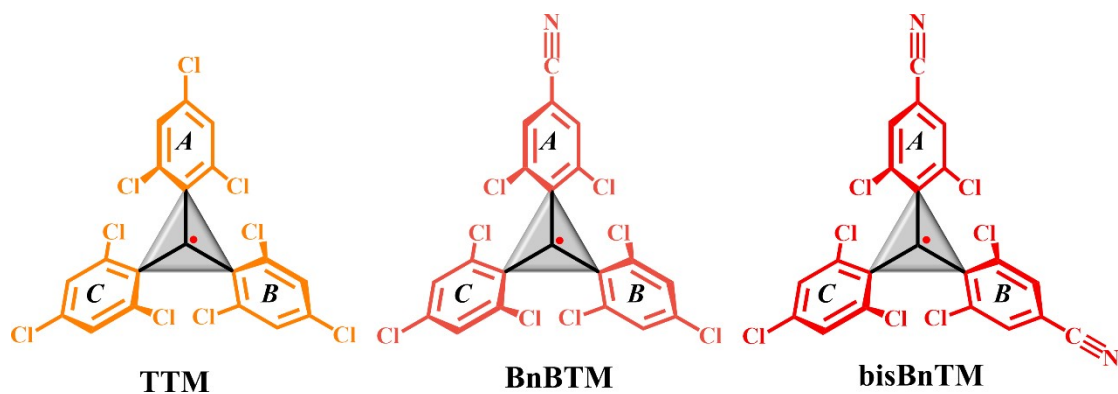

| radical | state | <i>A</i> (°) | <i>B</i> (°) | <i>C</i> (°) |
|---------|-------|--------------|--------------|--------------|
| TTM     | $D_1$ | <u>43.0</u>  | <u>42.1</u>  | 46.6         |
|         | $D_0$ | 48.9         | 48.8         | 48.8         |
| BnBTM   | $D_1$ | <u>35.4</u>  | 47.6         | 47.0         |
|         | $D_0$ | 48.4         | 48.7         | 48.9         |
| bisBnTM | $D_1$ | <u>40.8</u>  | <u>38.0</u>  | <u>51.7</u>  |
|         | $D_0$ | 48.6         | 48.5         | 48.6         |

#### 4. Electrochemical properties and TGA curve

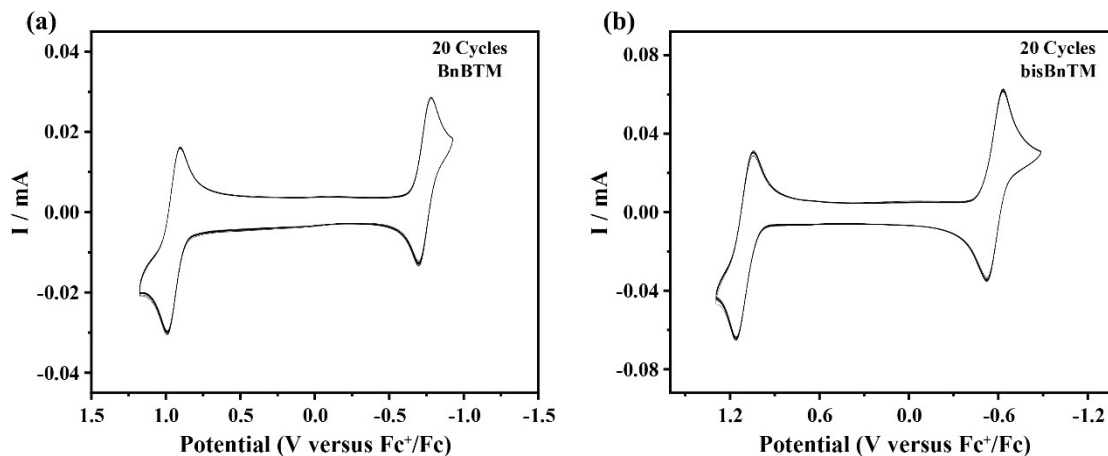

Fig. S20 Multi-cycle CV measurements (20 cycles) of BnBTM and bisBnTM in DCM.

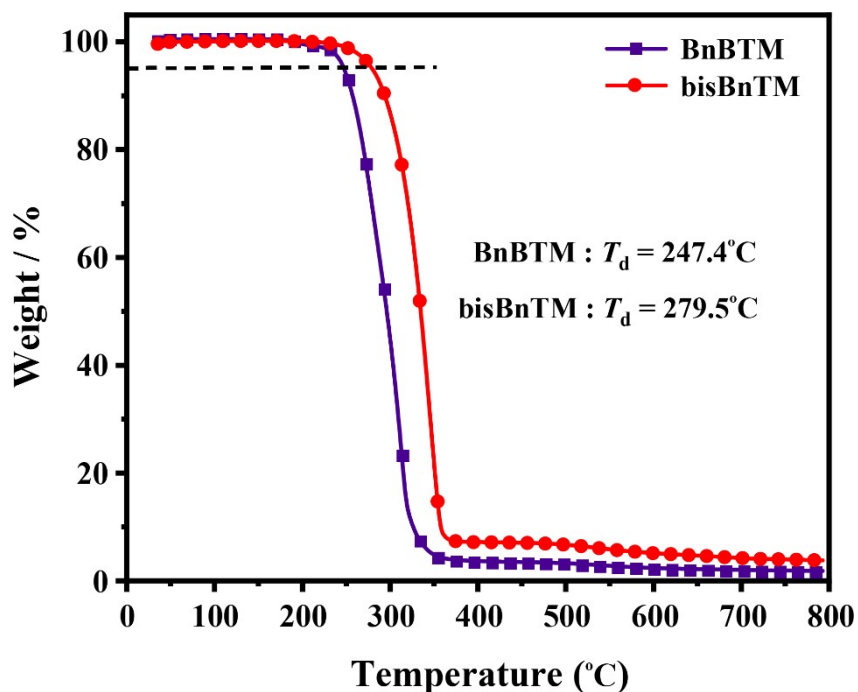

Fig. S21 TGA thermograph of BnBTM and bisBnTM recorded under nitrogen at a heating rate of  $10^\circ\text{C}/\text{min}$ .

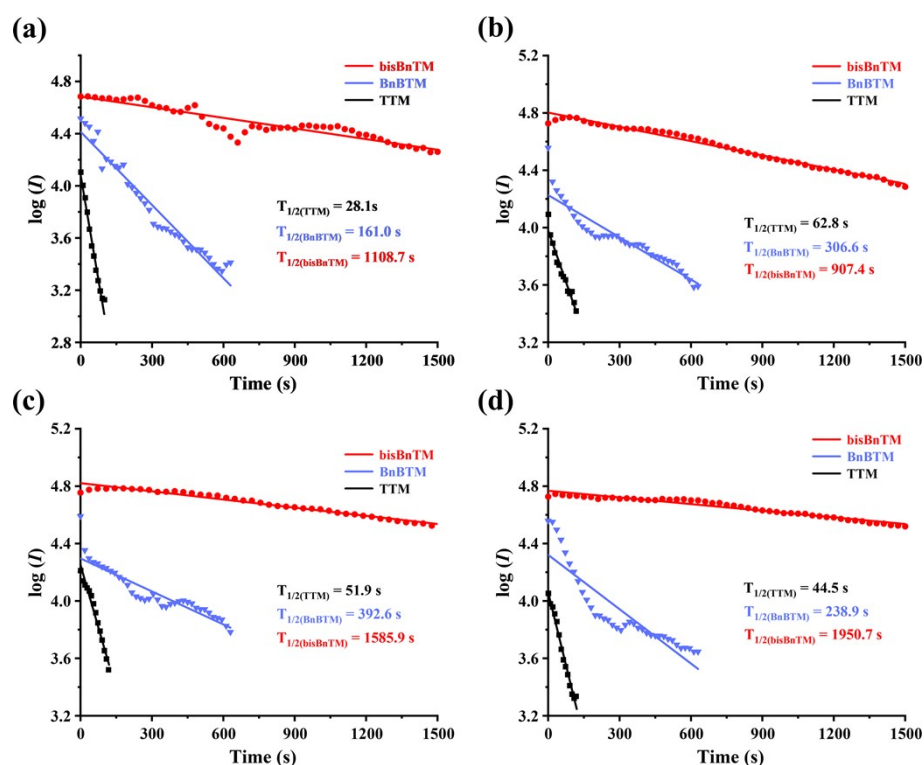

**Fig. S22** The fluorescence decay of TTM, BnBTM, and bisBnTM in (a) cyclohexane, (b) toluene, (c) chloroform, and (d) dichloromethane ( $5 \times 10^{-5} \text{M}$ ) under continuous excitation (measured by the RF-6000 Spectro-fluorophotometer with temporal measurement mode; power density:  $50 \text{ mW cm}^{-2}$ ).

## 5. Extracted results of TD-DFT calculations

**Table S7.** Excited states of TTM, BnBTM, and bisBnTM calculated by TD-DFT calculations.

### TTM (UB3LYP/6-31G(d,p))

Excitation energies and oscillator strengths:

|                  |         |           |           |          |                               |
|------------------|---------|-----------|-----------|----------|-------------------------------|
| Excited State 1: | 2.215-A | 2.6555 eV | 466.89 nm | f=0.0223 | $\langle S^2 \rangle = 0.976$ |
| 137A ->138A      |         | -0.19671  |           |          |                               |
| 137A ->139A      |         | 0.23171   |           |          |                               |
| 133B ->137B      |         | 0.23015   |           |          |                               |
| 135B ->137B      |         | -0.17750  |           |          |                               |
| 136B ->137B      |         | 0.86437   |           |          |                               |

This state for optimization and/or second-order correction.

Total Energy, E(TD-HF/TD-KS) = -4869.25503157

Copying the excited state density for this state as the 1-particle RhoCI density.

|                  |         |           |           |          |                               |
|------------------|---------|-----------|-----------|----------|-------------------------------|
| Excited State 2: | 2.215-A | 2.6558 eV | 466.85 nm | f=0.0223 | $\langle S^2 \rangle = 0.976$ |
|------------------|---------|-----------|-----------|----------|-------------------------------|

|                          |           |           |          |              |
|--------------------------|-----------|-----------|----------|--------------|
| 137A ->138A              | 0.23153   |           |          |              |
| 137A ->139A              | 0.19648   |           |          |              |
| 132B ->137B              | 0.22996   |           |          |              |
| 135B ->137B              | 0.86450   |           |          |              |
| 136B ->137B              | 0.17759   |           |          |              |
| Excited State 3: 2.100-A | 2.9287 eV | 423.34 nm | f=0.0065 | <S**2>=0.853 |
| 137A ->140A              | 0.15483   |           |          |              |
| 133B ->137B              | 0.19130   |           |          |              |
| 134B ->137B              | 0.94717   |           |          |              |
| Excited State 4: 2.126-A | 2.9295 eV | 423.22 nm | f=0.0029 | <S**2>=0.880 |
| 137A ->138A              | -0.17467  |           |          |              |
| 132B ->137B              | -0.28120  |           |          |              |
| 133B ->137B              | 0.83904   |           |          |              |
| 134B ->137B              | -0.16734  |           |          |              |
| 135B ->137B              | 0.17417   |           |          |              |
| 136B ->137B              | -0.27298  |           |          |              |
| Excited State 5: 2.126-A | 2.9297 eV | 423.19 nm | f=0.0029 | <S**2>=0.880 |
| 137A ->138A              | 0.10136   |           |          |              |
| 137A ->139A              | 0.17198   |           |          |              |
| 132B ->137B              | 0.84768   |           |          |              |
| 133B ->137B              | 0.25715   |           |          |              |
| 134B ->137B              | -0.16104  |           |          |              |
| 135B ->137B              | -0.27837  |           |          |              |
| 136B ->137B              | -0.16602  |           |          |              |
| Excited State 6: 2.357-A | 3.0873 eV | 401.60 nm | f=0.0000 | <S**2>=1.138 |
| 135A ->139A              | -0.13747  |           |          |              |
| 136A ->138A              | 0.13739   |           |          |              |
| 137A ->146A              | -0.24505  |           |          |              |
| 131B ->137B              | 0.87166   |           |          |              |
| 134B ->140B              | 0.10801   |           |          |              |
| Excited State 7: 2.371-A | 3.3456 eV | 370.59 nm | f=0.1795 | <S**2>=1.156 |
| 133A ->140A              | -0.10479  |           |          |              |
| 134A ->142A              | 0.12022   |           |          |              |
| 137A ->138A              | 0.77599   |           |          |              |
| 137A ->139A              | 0.18288   |           |          |              |
| 131B ->138B              | 0.10886   |           |          |              |
| 132B ->137B              | -0.28236  |           |          |              |
| 133B ->137B              | 0.15925   |           |          |              |
| 135B ->137B              | -0.28595  |           |          |              |

135B ->138B -0.10462  
136B ->139B 0.10420

Excited State 8: 2.371-A 3.3460 eV 370.54 nm f=0.1799 <S\*\*2>=1.156

132A ->140A 0.10469  
134A ->141A -0.12057  
137A ->138A -0.18299  
137A ->139A 0.77595  
131B ->139B 0.10894  
132B ->137B -0.15923  
133B ->137B -0.28202  
135B ->139B 0.10430  
136B ->137B -0.28620  
136B ->138B 0.10442

Excited State 9: 2.206-A 3.5834 eV 345.99 nm f=0.0110 <S\*\*2>=0.966

137A ->140A 0.95748  
134B ->137B -0.17194

Excited State 10: 3.250-A 3.6826 eV 336.68 nm f=0.0000 <S\*\*2>=2.390

132A ->138A 0.12501  
132A ->139A 0.11247  
132A ->141A -0.20880  
133A ->138A -0.11272  
133A ->139A 0.12504  
133A ->142A -0.20895  
134A ->140A 0.32063  
135A ->139A 0.15893  
135A ->142A 0.18339  
136A ->138A -0.15923  
136A ->141A -0.18331  
131B ->137B 0.40785  
131B ->146B 0.11784  
132B ->138B -0.14337  
132B ->141B 0.18726  
133B ->139B -0.14330  
133B ->142B 0.18752  
134B ->140B -0.29022  
135B ->138B -0.20390  
135B ->141B -0.16263  
136B ->139B -0.20374  
136B ->142B -0.16269

Excited State 11: 2.329-A 3.7700 eV 328.87 nm f=0.0057 <S\*\*2>=1.106

|             |          |
|-------------|----------|
| 133A ->140A | -0.11991 |
| 137A ->138A | -0.14751 |
| 137A ->141A | 0.91082  |
| 132B ->137B | 0.10256  |
| 133B ->140B | 0.11478  |

Excited State 12: 2.330-A 3.7705 eV 328.83 nm f=0.0056 <S\*\*2>=1.107

|             |          |
|-------------|----------|
| 132A ->140A | 0.12020  |
| 137A ->139A | -0.14801 |
| 137A ->142A | 0.91053  |
| 132B ->140B | -0.11506 |
| 133B ->137B | 0.10229  |

Excited State 13: 3.158-A 3.8750 eV 319.96 nm f=0.0135 <S\*\*2>=2.243

|             |          |
|-------------|----------|
| 132A ->141A | -0.11339 |
| 132A ->142A | 0.15433  |
| 133A ->140A | 0.26471  |
| 133A ->141A | 0.15440  |
| 133A ->142A | 0.11400  |
| 134A ->142A | -0.28381 |
| 135A ->139A | 0.14885  |
| 135A ->140A | -0.21369 |
| 136A ->138A | 0.14915  |
| 137A ->138A | 0.31430  |
| 137A ->139A | 0.25201  |
| 137A ->141A | 0.22953  |
| 132B ->141B | 0.11742  |
| 132B ->142B | -0.15191 |
| 133B ->140B | -0.27849 |
| 133B ->141B | -0.15169 |
| 133B ->142B | -0.11815 |
| 134B ->141B | -0.10191 |
| 134B ->142B | 0.28635  |
| 135B ->138B | 0.11506  |
| 136B ->139B | -0.11479 |
| 136B ->140B | 0.20942  |

Excited State 14: 3.158-A 3.8754 eV 319.93 nm f=0.0135 <S\*\*2>=2.243

|             |          |
|-------------|----------|
| 132A ->140A | -0.26441 |
| 132A ->141A | 0.15512  |
| 132A ->142A | 0.11354  |
| 133A ->141A | 0.11266  |
| 133A ->142A | -0.15471 |
| 134A ->141A | 0.28423  |

|             |          |
|-------------|----------|
| 135A ->138A | 0.14900  |
| 136A ->139A | -0.14863 |
| 136A ->140A | -0.21385 |
| 137A ->138A | -0.25169 |
| 137A ->139A | 0.31403  |
| 137A ->142A | 0.23044  |
| 132B ->140B | 0.27795  |
| 132B ->141B | -0.15239 |
| 132B ->142B | -0.11753 |
| 133B ->141B | -0.11643 |
| 133B ->142B | 0.15227  |
| 134B ->141B | -0.28712 |
| 134B ->142B | -0.10100 |
| 135B ->139B | -0.11452 |
| 135B ->140B | -0.20967 |
| 136B ->138B | -0.11491 |

Excited State 15: 3.309-A 4.3037 eV 288.09 nm f=0.0000 <S\*\*2>=2.488

|             |          |
|-------------|----------|
| 132A ->141A | -0.18871 |
| 133A ->142A | -0.18909 |
| 134A ->140A | 0.27021  |
| 135A ->138A | 0.12461  |
| 135A ->139A | -0.29207 |
| 135A ->142A | 0.10004  |
| 136A ->138A | 0.29319  |
| 136A ->139A | 0.12416  |
| 137A ->146A | -0.19575 |
| 126B ->137B | 0.29313  |
| 131B ->137B | -0.11368 |
| 132B ->141B | 0.18847  |
| 133B ->142B | 0.18888  |
| 134B ->140B | -0.27403 |
| 135B ->138B | 0.31331  |
| 135B ->139B | 0.11194  |
| 136B ->138B | -0.11253 |
| 136B ->139B | 0.31257  |

---

**BnBTM (UB3LYP/6-31G(d,p))**

Excitation energies and oscillator strengths:

Excited State 1: 2.170-A 2.5726 eV 481.94 nm f=0.0289 <S\*\*2>=0.927

|             |          |
|-------------|----------|
| 135A ->137A | 0.23896  |
| 132B ->135B | -0.12573 |
| 134B ->135B | 0.92385  |

This state for optimization and/or second-order correction.



Total Energy, E(TD-HF/TD-KS) = -4501.90357632

Copying the excited state density for this state as the 1-particle RhoCI density.

Excited State 2: 2.294-A 2.5737 eV 481.73 nm f=0.0054 <S\*\*2>=1.066

130A ->136A 0.11034

135A ->136A -0.43935

129B ->135B -0.15617

129B ->136B 0.12173

131B ->135B -0.43639

133B ->135B 0.70334

Excited State 3: 2.132-A 2.8103 eV 441.17 nm f=0.0005 <S\*\*2>=0.887

135A ->136A 0.29900

129B ->135B 0.14118

131B ->135B 0.63781

133B ->135B 0.66234

Excited State 4: 2.094-A 2.8212 eV 439.48 nm f=0.0070 <S\*\*2>=0.846

135A ->138A -0.10361

132B ->135B 0.96310

134B ->135B 0.16570

Excited State 5: 2.169-A 2.8664 eV 432.54 nm f=0.0082 <S\*\*2>=0.927

135A ->137A 0.14812

130B ->135B 0.95099

134B ->135B -0.13216

Excited State 6: 2.288-A 2.9724 eV 417.12 nm f=0.0547 <S\*\*2>=1.058

130A ->136A -0.16693

133A ->136A 0.10872

134A ->137A 0.11465

135A ->136A 0.36305

135A ->142A 0.10688

135A ->143A -0.15555

129B ->135B 0.66185

131B ->135B -0.48045

131B ->136B -0.13174

133B ->135B 0.12208

Excited State 7: 2.269-A 3.1861 eV 389.15 nm f=0.1891 <S\*\*2>=1.037

134A ->137A -0.11292

135A ->136A 0.69106

135A ->143A 0.12916

129B ->135B -0.48577

|             |          |
|-------------|----------|
| 131B ->135B | -0.35285 |
| 133B ->135B | 0.13575  |
| 134B ->137B | 0.11378  |

Excited State 8: 2.544-A 3.3508 eV 370.01 nm f=0.1449 <S\*\*2>=1.369

|             |          |
|-------------|----------|
| 132A ->140A | 0.16954  |
| 133A ->138A | -0.12295 |
| 135A ->137A | 0.77868  |
| 129B ->137B | -0.10009 |
| 130B ->135B | -0.20249 |
| 131B ->137B | 0.11846  |
| 132B ->135B | 0.12206  |
| 132B ->140B | -0.13717 |
| 133B ->137B | -0.10732 |
| 133B ->138B | -0.10593 |
| 134B ->135B | -0.27998 |
| 134B ->136B | 0.14759  |
| 134B ->144B | -0.10055 |

Excited State 9: 3.163-A 3.6360 eV 340.99 nm f=0.0014 <S\*\*2>=2.252

|             |          |
|-------------|----------|
| 130A ->136A | 0.26771  |
| 130A ->140A | -0.12405 |
| 131A ->137A | 0.12134  |
| 131A ->138A | -0.15573 |
| 131A ->139A | 0.18579  |
| 132A ->138A | 0.22766  |
| 133A ->136A | -0.18139 |
| 133A ->140A | -0.19684 |
| 134A ->137A | -0.15052 |
| 134A ->139A | 0.14956  |
| 129B ->135B | 0.46158  |
| 129B ->136B | 0.14936  |
| 129B ->144B | 0.10418  |
| 130B ->137B | 0.11918  |
| 130B ->138B | -0.14156 |
| 130B ->139B | 0.16845  |
| 131B ->136B | 0.27772  |
| 131B ->140B | -0.11654 |
| 132B ->138B | -0.20423 |
| 133B ->136B | -0.22572 |
| 133B ->140B | -0.17213 |
| 134B ->137B | 0.19354  |
| 134B ->139B | -0.13466 |

Excited State 10: 2.206-A 3.6442 eV 340.22 nm f=0.0093 <S\*\*2>=0.967  
135A ->138A 0.95750  
132B ->135B 0.11992

Excited State 11: 3.264-A 3.7630 eV 329.48 nm f=0.0057 <S\*\*2>=2.414  
129A ->136A 0.15810  
130A ->136A 0.13996  
130A ->140A 0.14867  
131A ->138A -0.25373  
131A ->139A 0.19915  
132A ->138A -0.15934  
132A ->139A -0.21750  
133A ->136A -0.19140  
133A ->140A 0.21903  
134A ->137A 0.22189  
134A ->138A -0.12971  
135A ->136A 0.28381  
135A ->140A -0.14635  
135A ->143A -0.10342  
129B ->136B 0.22563  
130B ->138B -0.26765  
130B ->139B 0.20865  
131B ->135B 0.12348  
131B ->140B 0.14812  
132B ->137B 0.10656  
132B ->138B 0.15290  
132B ->139B 0.21396  
133B ->135B -0.10755  
133B ->136B -0.10432  
133B ->140B 0.21070  
134B ->137B -0.21160  
134B ->138B 0.12050

Excited State 12: 2.428-A 3.8190 eV 324.65 nm f=0.0113 <S\*\*2>=1.224  
130A ->138A 0.15340  
132A ->140A -0.10945  
134A ->136A 0.12320  
134A ->140A -0.12636  
135A ->137A 0.29445  
135A ->139A 0.83159  
131B ->138B 0.14473  
132B ->140B 0.11433  
134B ->140B 0.12816

Excited State 13: 2.358-A 3.8435 eV 322.58 nm f=0.0015 <S\*\*2>=1.140

|             |          |
|-------------|----------|
| 134A ->138A | -0.14598 |
| 135A ->140A | 0.92039  |
| 131B ->135B | 0.10171  |
| 132B ->137B | -0.11293 |
| 134B ->138B | 0.13945  |

Excited State 14: 2.979-A 3.8947 eV 318.34 nm f=0.0158 <S\*\*2>=1.969

|             |          |
|-------------|----------|
| 130A ->138A | -0.10365 |
| 130A ->139A | -0.15498 |
| 132A ->140A | 0.31298  |
| 133A ->138A | -0.27041 |
| 133A ->139A | -0.15629 |
| 134A ->136A | -0.17611 |
| 135A ->137A | -0.40192 |
| 135A ->139A | 0.43752  |
| 128B ->135B | -0.13322 |
| 131B ->138B | -0.12917 |
| 131B ->139B | -0.15467 |
| 132B ->140B | -0.31930 |
| 133B ->137B | -0.10219 |
| 133B ->138B | -0.26631 |
| 133B ->139B | -0.15981 |
| 134B ->136B | 0.14402  |

Excited State 15: 3.390-A 4.0930 eV 302.92 nm f=0.0021 <S\*\*2>=2.623

|             |          |
|-------------|----------|
| 131A ->136A | 0.63089  |
| 132A ->136A | -0.19562 |
| 134A ->136A | 0.31870  |
| 130B ->135B | 0.13971  |
| 130B ->136B | 0.52646  |
| 132B ->136B | 0.15280  |
| 134B ->136B | -0.24290 |

---

**bisBnTM (UB3LYP/6-31G(d,p))**

Excitation energies and oscillator strengths:

Excited State 1: 2.187-A 2.5126 eV 493.46 nm f=0.0250 <S\*\*2>=0.946

|             |         |
|-------------|---------|
| 133A ->135A | 0.25623 |
| 129B ->133B | 0.14634 |
| 132B ->133B | 0.91610 |

This state for optimization and/or second-order correction.

Total Energy, E(TD-HF/TD-KS) = -4134.55082329

Copying the excited state density for this state as the 1-particle RhoCI density.

|               |    |             |           |           |          |                                  |
|---------------|----|-------------|-----------|-----------|----------|----------------------------------|
| Excited State | 2: | 2.299-A     | 2.5252 eV | 490.98 nm | f=0.0033 | $\langle S^{*2} \rangle = 1.071$ |
|               |    | 133A ->134A | 0.44614   |           |          |                                  |
|               |    | 127B ->134B | 0.12439   |           |          |                                  |
|               |    | 128B ->133B | 0.49624   |           |          |                                  |
|               |    | 130B ->133B | 0.27093   |           |          |                                  |
|               |    | 131B ->133B | 0.62082   |           |          |                                  |
| Excited State | 3: | 2.119-A     | 2.7191 eV | 455.97 nm | f=0.0021 | $\langle S^{*2} \rangle = 0.872$ |
|               |    | 133A ->134A | -0.25188  |           |          |                                  |
|               |    | 128B ->133B | -0.42164  |           |          |                                  |
|               |    | 130B ->133B | -0.40424  |           |          |                                  |
|               |    | 131B ->133B | 0.74575   |           |          |                                  |
| Excited State | 4: | 2.145-A     | 2.7695 eV | 447.67 nm | f=0.0065 | $\langle S^{*2} \rangle = 0.900$ |
|               |    | 133A ->134A | -0.16567  |           |          |                                  |
|               |    | 128B ->133B | -0.44684  |           |          |                                  |
|               |    | 130B ->133B | 0.84153   |           |          |                                  |
|               |    | 131B ->133B | 0.13966   |           |          |                                  |
| Excited State | 5: | 2.162-A     | 2.7817 eV | 445.71 nm | f=0.0062 | $\langle S^{*2} \rangle = 0.919$ |
|               |    | 133A ->135A | 0.18105   |           |          |                                  |
|               |    | 129B ->133B | 0.92563   |           |          |                                  |
|               |    | 132B ->133B | -0.23122  |           |          |                                  |
| Excited State | 6: | 2.442-A     | 2.9356 eV | 422.35 nm | f=0.0150 | $\langle S^{*2} \rangle = 1.241$ |
|               |    | 128A ->134A | -0.21209  |           |          |                                  |
|               |    | 131A ->134A | -0.11397  |           |          |                                  |
|               |    | 132A ->135A | -0.14173  |           |          |                                  |
|               |    | 133A ->135A | 0.29880   |           |          |                                  |
|               |    | 133A ->139A | -0.20278  |           |          |                                  |
|               |    | 127B ->133B | 0.76599   |           |          |                                  |
|               |    | 128B ->134B | 0.17652   |           |          |                                  |
|               |    | 129B ->133B | -0.19146  |           |          |                                  |
|               |    | 132B ->133B | -0.15787  |           |          |                                  |
| Excited State | 7: | 2.108-A     | 3.0886 eV | 401.43 nm | f=0.2522 | $\langle S^{*2} \rangle = 0.861$ |
|               |    | 133A ->134A | 0.77344   |           |          |                                  |
|               |    | 125B ->133B | 0.10943   |           |          |                                  |
|               |    | 128B ->133B | -0.57147  |           |          |                                  |
|               |    | 130B ->133B | -0.12554  |           |          |                                  |
|               |    | 131B ->133B | -0.11044  |           |          |                                  |
| Excited State | 8: | 2.444-A     | 3.2756 eV | 378.51 nm | f=0.1558 | $\langle S^{*2} \rangle = 1.243$ |

|             |          |
|-------------|----------|
| 131A ->138A | 0.15486  |
| 132A ->135A | 0.11702  |
| 133A ->135A | 0.76206  |
| 133A ->139A | 0.17719  |
| 127B ->133B | -0.30323 |
| 129B ->133B | -0.21304 |
| 131B ->138B | -0.12934 |
| 132B ->133B | -0.23697 |
| 132B ->135B | -0.16078 |

Excited State 9: 3.138-A 3.5833 eV 346.00 nm f=0.0001 <S\*\*2>=2.212

|             |          |
|-------------|----------|
| 128A ->134A | 0.29136  |
| 129A ->135A | 0.13223  |
| 129A ->137A | -0.18298 |
| 130A ->136A | 0.23252  |
| 131A ->134A | 0.15555  |
| 131A ->138A | 0.17946  |
| 132A ->135A | 0.17596  |
| 132A ->137A | 0.13943  |
| 127B ->133B | 0.48082  |
| 127B ->135B | -0.11410 |
| 127B ->140B | 0.11286  |
| 128B ->134B | -0.33651 |
| 129B ->135B | -0.12430 |
| 129B ->137B | 0.17251  |
| 130B ->134B | -0.12094 |
| 130B ->136B | -0.20969 |
| 131B ->134B | -0.18453 |
| 131B ->138B | -0.15865 |
| 132B ->135B | -0.21830 |
| 132B ->137B | -0.12002 |

Excited State 10: 2.399-A 3.7098 eV 334.21 nm f=0.0073 <S\*\*2>=1.189

|             |          |
|-------------|----------|
| 129A ->136A | -0.10696 |
| 130A ->137A | 0.12774  |
| 132A ->134A | -0.14201 |
| 133A ->134A | -0.12063 |
| 133A ->136A | 0.88052  |
| 127B ->134B | 0.11239  |
| 130B ->133B | -0.12246 |
| 130B ->137B | -0.12814 |
| 131B ->135B | 0.12304  |

Excited State 11: 3.116-A 3.7108 eV 334.12 nm f=0.0089 <S\*\*2>=2.178

|             |          |
|-------------|----------|
| 127A ->134A | 0.17592  |
| 128A ->135A | 0.16573  |
| 128A ->137A | 0.15838  |
| 129A ->136A | 0.22380  |
| 130A ->135A | 0.10206  |
| 130A ->137A | -0.22569 |
| 131A ->135A | 0.13687  |
| 132A ->134A | 0.27791  |
| 132A ->136A | -0.14301 |
| 132A ->138A | -0.10452 |
| 133A ->134A | 0.27538  |
| 133A ->136A | 0.37346  |
| 125B ->133B | -0.10799 |
| 127B ->134B | -0.24436 |
| 128B ->133B | 0.15160  |
| 128B ->135B | -0.16743 |
| 128B ->137B | -0.16113 |
| 129B ->136B | -0.24536 |
| 130B ->137B | 0.23502  |
| 132B ->134B | -0.24204 |
| 132B ->136B | 0.12550  |
| 132B ->138B | 0.10362  |

Excited State 12: 3.139-A 3.8019 eV 326.11 nm f=0.0203 <S\*\*2>=2.213

|             |          |
|-------------|----------|
| 127A ->135A | 0.11287  |
| 128A ->134A | 0.12848  |
| 128A ->136A | -0.15023 |
| 129A ->137A | -0.11166 |
| 130A ->138A | 0.20774  |
| 131A ->134A | 0.17920  |
| 131A ->136A | 0.23846  |
| 131A ->138A | -0.32086 |
| 132A ->135A | -0.17269 |
| 132A ->139A | -0.10457 |
| 133A ->135A | 0.42560  |
| 133A ->137A | -0.17128 |
| 127B ->135B | -0.10996 |
| 128B ->134B | -0.10391 |
| 128B ->136B | 0.15552  |
| 129B ->137B | 0.14388  |
| 130B ->138B | -0.20523 |
| 131B ->134B | -0.10764 |
| 131B ->136B | -0.23467 |
| 131B ->138B | 0.32397  |

|                   |          |           |           |          |              |
|-------------------|----------|-----------|-----------|----------|--------------|
| 132B ->135B       | 0.19681  |           |           |          |              |
| Excited State 13: | 2.348-A  | 3.8987 eV | 318.01 nm | f=0.0003 | <S**2>=1.128 |
| 131A ->136A       | 0.10671  |           |           |          |              |
| 133A ->137A       | 0.90144  |           |           |          |              |
| 129B ->133B       | 0.12814  |           |           |          |              |
| 130B ->134B       | -0.20981 |           |           |          |              |
| 131B ->136B       | -0.10651 |           |           |          |              |
| Excited State 14: | 2.379-A  | 3.9035 eV | 317.62 nm | f=0.0016 | <S**2>=1.165 |
| 132A ->136A       | -0.13621 |           |           |          |              |
| 133A ->138A       | 0.90979  |           |           |          |              |
| 129B ->134B       | 0.12532  |           |           |          |              |
| 130B ->135B       | 0.11076  |           |           |          |              |
| 131B ->135B       | -0.13526 |           |           |          |              |
| 132B ->136B       | 0.13062  |           |           |          |              |
| 132B ->138B       | -0.10809 |           |           |          |              |
| Excited State 15: | 3.394-A  | 4.0259 eV | 307.97 nm | f=0.0014 | <S**2>=2.630 |
| 128A ->135A       | -0.11589 |           |           |          |              |
| 129A ->134A       | 0.49757  |           |           |          |              |
| 130A ->135A       | 0.28901  |           |           |          |              |
| 130A ->139A       | -0.10081 |           |           |          |              |
| 132A ->134A       | -0.40624 |           |           |          |              |
| 133A ->138A       | 0.12882  |           |           |          |              |
| 129B ->134B       | -0.44776 |           |           |          |              |
| 130B ->133B       | 0.12003  |           |           |          |              |
| 130B ->135B       | -0.22283 |           |           |          |              |
| 132B ->134B       | 0.31741  |           |           |          |              |

---

**Table S8.** Optimized excited states of BnBTM and bisBnTM calculated by TD-DFT calculations.

---

**BnBTM (UB3LYP/6-31G(d,p))**

|                  |          |           |           |          |              |
|------------------|----------|-----------|-----------|----------|--------------|
| Excited State 1: | 2.120-A  | 2.0962 eV | 591.46 nm | f=0.0270 | <S**2>=0.873 |
| 135A ->136A      | 0.19125  |           |           |          |              |
| 135A ->137A      | 0.12686  |           |           |          |              |
| 134B ->135B      | -0.94928 |           |           |          |              |

This state for optimization and/or second-order correction.

Total Energy, E(TD-HF/TD-KS) = -4501.91166398

Copying the excited state density for this state as the 1-particle RhoCI density.

|                  |         |           |           |          |              |
|------------------|---------|-----------|-----------|----------|--------------|
| Excited State 2: | 2.151-A | 2.3540 eV | 526.70 nm | f=0.0234 | <S**2>=0.907 |
|------------------|---------|-----------|-----------|----------|--------------|



|             |          |
|-------------|----------|
| 135A ->136A | 0.28699  |
| 135A ->137A | -0.15242 |
| 129B ->135B | 0.11910  |
| 131B ->135B | -0.17141 |
| 133B ->135B | -0.88380 |
| 134B ->135B | 0.10823  |

Excited State 3: 2.087-A 2.5499 eV 486.24 nm f=0.0091 <S\*\*2>=0.839

|             |          |
|-------------|----------|
| 135A ->138A | -0.10535 |
| 130B ->135B | -0.18351 |
| 132B ->135B | 0.95602  |

Excited State 4: 2.109-A 2.6474 eV 468.33 nm f=0.0002 <S\*\*2>=0.862

|             |          |
|-------------|----------|
| 135A ->136A | -0.32795 |
| 129B ->135B | -0.15913 |
| 130B ->135B | 0.11001  |
| 131B ->135B | 0.83361  |
| 132B ->135B | -0.10293 |
| 133B ->135B | -0.31634 |
| 134B ->135B | -0.10784 |

Excited State 5: 2.128-A 2.7072 eV 457.98 nm f=0.0062 <S\*\*2>=0.882

|             |          |
|-------------|----------|
| 135A ->137A | -0.15702 |
| 135A ->139A | -0.10334 |
| 130B ->135B | -0.92414 |
| 131B ->135B | 0.13540  |
| 132B ->135B | -0.20283 |

Excited State 6: 2.165-A 2.8451 eV 435.79 nm f=0.0882 <S\*\*2>=0.922

|             |          |
|-------------|----------|
| 131A ->136A | 0.10338  |
| 133A ->136A | 0.10161  |
| 135A ->136A | 0.52163  |
| 127B ->135B | -0.10251 |
| 129B ->135B | 0.61341  |
| 130B ->135B | 0.10404  |
| 131B ->135B | 0.41766  |
| 133B ->135B | 0.17776  |
| 134B ->135B | 0.11023  |

---

**BisBnTM (UB3LYP/6-31G(d,p))**

Excited State 1: 2.095-A 1.9726 eV 628.53 nm f=0.0289 <S\*\*2>=0.847

|             |         |
|-------------|---------|
| 133A ->135A | 0.15036 |
| 132B ->133B | 0.97172 |

This state for optimization and/or second-order correction.

Total Energy, E(TD-HF/TD-KS) = -4134.55961738

Copying the excited state density for this state as the 1-particle RhoCI density.

Excited State 2: 2.185-A 2.2930 eV 540.72 nm f=0.0119 <S\*\*2>=0.944  
133A ->134A -0.39560  
129B ->133B -0.35588  
130B ->133B -0.48044  
131B ->133B 0.65271

Excited State 3: 2.085-A 2.4577 eV 504.46 nm f=0.0075 <S\*\*2>=0.837  
130B ->133B -0.80478  
131B ->133B -0.56760

Excited State 4: 2.114-A 2.5677 eV 482.86 nm f=0.0002 <S\*\*2>=0.867  
133A ->134A 0.29337  
129B ->133B 0.77881  
130B ->133B -0.25686  
131B ->133B 0.45110

Excited State 5: 2.131-A 2.6331 eV 470.87 nm f=0.0079 <S\*\*2>=0.885  
133A ->135A 0.15090  
128B ->133B -0.96252

Excited State 6: 2.337-A 2.8346 eV 437.39 nm f=0.0150 <S\*\*2>=1.115  
129A ->134A 0.17779  
131A ->134A 0.11818  
133A ->135A 0.51564  
133A ->139A -0.14941  
127B ->133B 0.72083  
128B ->133B 0.10778  
129B ->134B 0.13897  
131B ->134B -0.10665  
132B ->133B -0.10804

---

## 6. References

- 1 R. B. Gaussian 09, M. J. Frisch, G. W. Trucks, H. B. Schlegel, G. E. Scuseria, M. A. Robb, J. R. Cheeseman, G. Scalmani, V. Barone, G. A. Petersson, H. Nakatsuji, X. Li, M. Caricato, A. Marenich, J. Bloino, B. G. Janesko, R. Gomperts, B. Mennucci, H. P. Hratchian, J. V. Ortiz, A. F. Izmaylov, J. L. Sonnenberg, D. Williams-Young, F. Ding, F. Lipparini, F. Egidi, J. Goings, B. Peng, A. Petrone, T. Henderson, D. Ranasinghe, V. G. Zakrzewski, J. Gao, N. Rega, G. Zheng, W. Liang, M. Hada, M. Ehara, K. Toyota, R. Fukuda, J. Hasegawa, M. Ishida, T. Nakajima, Y. Honda, O. Kitao, H. Nakai, T. Vreven, K. Throssell, J. A. Montgomery, Jr., J. E. Peralta, F. Ogliaro, M. Bearpark, J. J. Heyd, E. Brothers, K. N. Kudin, V. N. Staroverov, T. Keith, R. Kobayashi, J. Normand, K. Raghavachari, A. Rendell, J. C. Burant, S. S. Iyengar, J. Tomasi, M. Cossi, J. M. Millam, M. Klene, C. Adamo, R. Cammi, J. W. Ochterski, R. L. Martin, K. Morokuma, O. Farkas, J. B. Foresman, and D. J. Fox, Gaussian, Inc., Wallingford CT, 2016.
- 2 N. Roques, D. Maspoch, K. Wurst, D. Ruiz-Molina, C. Rovira, J. Veciana, *Chem. Eur. J.*, 2006, **12**, 9238–9253.

- 3 S. Oda, T. Sugitani, H. Tanaka, K. Tabata, R. Kawasumi, T. Hatakeyama, *Adv. Mater.*, 2022, **34**, 2201778–2201783.
- 4 T. Lu, F. Chen, *J. Comput. Chem.*, 2012, **33**, 580–592.
